# Supplementary material for: Influence of Food Habits and Participation in a National Extracurricular Athletics Program on Body Weight within a Pair-Matched Sample of Polish Adolescents after One Year of Intervention—#goathletics Study
Source: MDPI journal article supplement (doi:10.3390/nu15245106), 2023-12-14
Supplement: s1 [file s1]

*Supplementary Material*

# **Influence of Food Habits and Participation in a National Extracurricular Athletics Program on Body Weight within a Pair-Matched Sample of Polish Adolescents after One Year of Intervention — #goathletics Study**

**Dominika Głabska <sup>1</sup>, Dominika Guzek <sup>2,\*</sup>, Dominika Skolmowska <sup>1</sup>, Jakub Grzegorz Adamczyk <sup>3</sup>, Hanna Nałęcz <sup>4</sup>, Blanka Mellová <sup>5</sup>, Katarzyna Żywczyk <sup>5</sup>, Joanna Baj-Korpak <sup>6</sup> and Krystyna Gutkowska <sup>2</sup>**

<sup>1</sup> Department of Dietetics, Institute of Human Nutrition Sciences, Warsaw University of Life Sciences (SGGW-WULS), 159C Nowoursynowska Street, 02-776 Warsaw, Poland; dominika\_glabska@sggw.edu.pl (D.G.); dominika\_skolmowska@sggw.edu.pl (D.S.)

<sup>2</sup> Department of Food Market and Consumer Research, Institute of Human Nutrition Sciences, Warsaw University of Life Sciences (SGGW-WULS), 159C Nowoursynowska Street, 02-776 Warsaw, Poland; krystyna\_gutkowska@sggw.edu.pl

<sup>3</sup> Department of Theory of Sport, Józef Piłsudski University of Physical Education, 34 Marymoncka Street, 00-968 Warsaw, Poland; jakub.adamczyk@awf.edu.pl

<sup>4</sup> Pedagogy and Psychology Department, Józef Piłsudski University of Physical Education, 34 Marymoncka Street, 00-968 Warsaw, Poland; hanna.nalecz@awf.edu.pl

<sup>5</sup> Nutrition, Health and Wellness Unit, Nestlé Polska S.A., 32 Domaniewska Street, 02-672 Warsaw, Poland; blanka.mellova@pl.nestle.com (B.M.); katarzyna.zywczyk@pl.nestle.com (K.Ż.)

<sup>6</sup> Department of Physiotherapy, Faculty of Health Sciences, John Paul II University in Biala Podlaska, 95/97 Sidorska Street, 21-500 Biala Podlaska, Poland; j.baj-korpak@dyd.akademiabialska.pl

\* Correspondence: dominika\_guzek@sggw.pl; Tel.: +48-22-593-71-34

**Supplementary Table S1.** The general anthropometric characteristics of the female participants in the intervention group and control group within the #goathletics Study.

|               |                   | Female participants in<br>intervention group (N = 281) |                      | Female participants in control<br>group (N = 281) |                       | <i>p</i> ** |
|---------------|-------------------|--------------------------------------------------------|----------------------|---------------------------------------------------|-----------------------|-------------|
|               |                   | Mean (SD)                                              | Median (min-max)     | Mean (SD)                                         | Median (min-max)      |             |
| Body weight   | kg                | 43.35 (8.36)                                           | 43.8* (25.4-79)      | 46.15 (10.9)                                      | 44.2* (23-92)         | 0.0114      |
|               | Centile           | 45.72 (25.32)                                          | 46* (1-99)           | 53.23 (29.17)                                     | 55* (0-137)           | 0.0018      |
| Height        | cm                | 155 (8.44)                                             | 155* (126.5-174.5)   | 154.2 (8.36)                                      | 154 (132-186)         | 0.1274      |
|               | Centile           | 52.33 (29.12)                                          | 55* (0-100)          | 49.04 (29.72)                                     | 50* (1-100)           | 0.1881      |
| BMI           | kg/m <sup>2</sup> | 17.9 (2.19)                                            | 17.75* (12.94-27.34) | 19.23 (3.34)                                      | 18.74* (13-35)        | <0.0001     |
|               | Centile           | 43.22 (24.56)                                          | 42* (0-98)           | 54.78 (28.4)                                      | 59* (1-100)           | <0.0001     |
| Waist         | cm                | 63.67 (7.3)                                            | 63* (45-86.67)       | 66.11 (9.32)                                      | 64.33* (29.67-100.17) | 0.0035      |
| circumference | WHtR              | 0.43 (0.23)                                            | 0.41* (0.31-3.6)     | 0.43 (0.06)                                       | 0.42* (0.2-0.62)      | 0.0007      |

\* non-parametric distribution ( $p < 0.05$ ; Shapiro-Wilk test); \*\* Mann-Whitney U test; BMI – Body Mass Index; WHtR – waist-to-height ratio.

**Supplementary Table S2.** The general anthropometric characteristics of the male participants in the intervention group and control group within the #goathletics Study.

|               |                   | Male participants in intervention<br>group (N = 225) |                      | Male participants in control group<br>(N = 225) |                      | <i>p</i> ** |
|---------------|-------------------|------------------------------------------------------|----------------------|-------------------------------------------------|----------------------|-------------|
|               |                   | Mean (SD)                                            | Median (min-max)     | Mean (SD)                                       | Median (min-max)     |             |
| Body weight   | kg                | 43.92 (10.18)                                        | 42.6* (24.6-88.8)    | 47.08 (11.21)                                   | 45.2* (23-79.6)      | 0.0013      |
|               | Centile           | 44.86 (25.7)                                         | 43* (1-98)           | 53.91 (28.94)                                   | 56* (0-99)           | 0.0005      |
| Height        | cm                | 155.93 (10.94)                                       | 155* (126.5-188.5)   | 155.13 (10.06)                                  | 155 (130-184)        | 0.6327      |
|               | Centile           | 52.72 (28.6)                                         | 52* (1-100)          | 51.56 (30.4)                                    | 52* (0-100)          | 0.6866      |
| BMI           | kg/m <sup>2</sup> | 17.85 (2.35)                                         | 17.53* (13.32-28.34) | 19.37 (3.35)                                    | 18.85* (13.61-31.24) | <0.0001     |
|               | Centile           | 41.54 (25.42)                                        | 39* (0-97)           | 54.84 (29.09)                                   | 56* (1-99)           | <0.0001     |
| Waist         | cm                | 66.27 (8.03)                                         | 64.67* (51-96.33)    | 69.74 (9.21)                                    | 69* (51.67-96.33)    | <0.0001     |
| circumference | WHtR              | 0.43 (0.04)                                          | 0.42* (0.33-0.56)    | 0.46 (0.1)                                      | 0.44 (0.35-1.76)     | <0.0001     |

\* non-parametric distribution ( $p < 0.05$ ; Shapiro-Wilk test); \*\* Mann-Whitney U test; BMI – Body Mass Index; WHtR – waist-to-height ratio.

**Supplementary Table S3.** The general anthropometric characteristics of the intervention group for subgroups within the #goathletics Study stratified by the Adolescents' Food Habits Checklist (AFHC) score quartile.

|                        |                      | Lowest score for food habits<br>(Q1 for AFHC)<br>(N = 114, including N = 64 female<br>and N = 50 male) |                      | Average score for food habits<br>(Q2 and Q3 for AFHC)<br>(N = 242, including N = 134 female and<br>N = 108 male) |                      | Highest score for food habits<br>(Q4 for AFHC)<br>(N = 150, including N = 83 female<br>and N = 67 male) |                      | <i>p</i> ** |
|------------------------|----------------------|--------------------------------------------------------------------------------------------------------|----------------------|------------------------------------------------------------------------------------------------------------------|----------------------|---------------------------------------------------------------------------------------------------------|----------------------|-------------|
|                        |                      | Mean (SD)                                                                                              | Median (min-max)     | Mean (SD)                                                                                                        | Median (min-max)     | Mean (SD)                                                                                               | Median (min-max)     |             |
| Body weight            | [kg]                 | 44.51 (10.48)                                                                                          | 42.6* (29-88.8)      | 43.57 (9.06)                                                                                                     | 43.8* (25.4-73.2)    | 42.76 (8.08)                                                                                            | 43* (24.6-69)        | 0.7572      |
|                        | Centile              | 45.87 (26.19)                                                                                          | 47* (2-99)           | 44.75 (25.84)                                                                                                    | 43* (1-98)           | 45.98 (24.11)                                                                                           | 47* (3-93)           | 0.8531      |
| Height                 | [cm]                 | 156.49 (10.36)                                                                                         | 155.5 (132-181)      | 155.27 (9.63)                                                                                                    | 155 (127.5-188.5)    | 154.64 (8.82)                                                                                           | 155 (126.5-180)      | 0.1796      |
|                        | Centile              | 53.63 (29.35)                                                                                          | 55* (1-100)          | 51.23 (28.64)                                                                                                    | 52* (0-100)          | 53.89 (28.92)                                                                                           | 56* (0-99)           | 0.6219      |
| BMI                    | [kg/m <sup>2</sup> ] | 17.98 (2.55)                                                                                           | 17.59* (13.97-28.34) | 17.9 (2.27)                                                                                                      | 17.69* (12.94-25.63) | 17.73 (1.89)                                                                                            | 17.75* (13.21-22.31) | 0.9534      |
|                        | Centile              | 41.54 (26.14)                                                                                          | 41* (1-98)           | 42.7 (25.47)                                                                                                     | 41* (0-96)           | 42.94 (22.71)                                                                                           | 42 (1-90)            | 0.7885      |
| Waist<br>circumference | [cm]                 | 64.84 (8.2)                                                                                            | 63* (52.33-96.33)    | 64.84 (7.9)                                                                                                      | 63.2* (45-86.67)     | 64.77 (6.96)                                                                                            | 64.67* (48.33-83)    | 0.8788      |
|                        | WHtR                 | 0.43 (0.19)                                                                                            | 0.41* (0.33-2.51)    | 0.42 (0.04)                                                                                                      | 0.41* (0.31-0.56)    | 0.44 (0.28)                                                                                             | 0.42* (0.32-3.6)     | 0.3796      |

\* non-parametric distribution ( $p < 0.05$ ; Shapiro-Wilk test); \*\* analysis of variance (ANOVA)/ Kruskal–Wallis ANOVA; BMI – Body Mass Index; WHtR – waist-to-height ratio.

**Supplementary Table S4.** The general anthropometric characteristics of the control group for subgroups within the #goathletics Study stratified by the Adolescents' Food Habits Checklist (AFHC) score quartile.

|                        |                      | Lowest score for food habits<br>(Q1 for AFHC)<br>(N = 139, including N = 59 female<br>and N = 80 male) |                    | Average score for food habits<br>(Q2 and Q3 for AFHC)<br>(N = 264, including N = 153 female<br>and N = 111 male) |                   | Highest score for food habits<br>(Q4 for AFHC)<br>(N = 103, including N = 69 female<br>and N = 34 male) |                      | <i>p</i> ** |
|------------------------|----------------------|--------------------------------------------------------------------------------------------------------|--------------------|------------------------------------------------------------------------------------------------------------------|-------------------|---------------------------------------------------------------------------------------------------------|----------------------|-------------|
|                        |                      | Mean (SD)                                                                                              | Median (min-max)   | Mean (SD)                                                                                                        | Median (min-max)  | Mean (SD)                                                                                               | Median (min-max)     |             |
| Body weight            | [kg]                 | 47.45 (11.9)                                                                                           | 45* (23-92)        | 46.87 (10.63)                                                                                                    | 45* (26.4-88)     | 45.06 (10.89)                                                                                           | 44* (23-74)          | 0.2477      |
|                        | Centile              | 54.39 (29.42)                                                                                          | 55* (0-137)        | 55.23 (27.89)                                                                                                    | 59* (1-100)       | 49.31 (30.66)                                                                                           | 51* (0-98)           | 0.1809      |
| Height                 | [cm]                 | 155.43 (8.71)                                                                                          | 155 (133-176)      | 154.56 (9.06)                                                                                                    | 154 (132-186)     | 153.91 (9.77)                                                                                           | 154 (130-180)        | 0.6616      |
|                        | Centile              | 49.98 (30.75)                                                                                          | 45* (1-100)        | 50.81 (29.42)                                                                                                    | 52* (0-100)       | 49.06 (30.66)                                                                                           | 46* (1-100)          | 0.8816      |
| BMI                    | [kg/m <sup>2</sup> ] | 19.42 (3.48)                                                                                           | 18.9* (13-33.79)   | 19.47 (3.3)                                                                                                      | 18.81* (13.78-35) | 18.82 (3.25)                                                                                            | 18.47* (13.61-27.99) | 0.1103      |
|                        | Centile              | 55.24 (28)                                                                                             | 59* (1-100)        | 56.95 (27.76)                                                                                                    | 61.5* (2-100)     | 50.12 (30.77)                                                                                           | 53* (1-98)           | 0.1263      |
| Waist<br>circumference | [cm]                 | 66.83 (9.84)                                                                                           | 65* (29.67-100.17) | 68.17 (9.24)                                                                                                     | 66.67* (44.33-96) | 67.74 (9.42)                                                                                            | 66* (52.33-96.33)    | 0.2951      |
|                        | WHtR                 | 0.43 (0.06)                                                                                            | 0.42* (0.2-0.61)   | 0.44 (0.06)                                                                                                      | 0.43* (0.28-0.62) | 0.45 (0.13)                                                                                             | 0.43* (0.35-1.76)    | 0.1512      |

\* non-parametric distribution ( $p < 0.05$ ; Shapiro-Wilk test); \*\* analysis of variance (ANOVA)/ Kruskal-Wallis ANOVA; BMI – Body Mass Index; WHtR – waist-to-height ratio

8  
910  
11
